# Supplementary material
Source: publisher figshare collection journal article supplement (https://acs.figshare.com/ndownloader/files/4387306)

## Supporting Information

### Biocatalytic Separation of N-7/N-9 Guanine Nucleosides

Sunil K. Singh,<sup>a</sup> Vivek K. Sharma,<sup>a</sup> Carl E. Olsen,<sup>b</sup> Jesper Wengel,<sup>c</sup> Virinder S. Parmar<sup>a,c</sup>  
and Ashok K. Prasad<sup>a,\*</sup>

<sup>a</sup>Bioorganic Laboratory, Department of Chemistry, University of Delhi, Delhi-110 007, India; <sup>b</sup>University of Copenhagen, Faculty of Life Sciences, Department of Natural Sciences, DK- 1871, Frederiksberg C, Denmark; <sup>c</sup>Nucleic Acid Centre, Department of Physics and Chemistry, University of Southern Denmark, 5230 Odense M, Denmark  
ashokenzyme@yahoo.com

|                                                                                                                                       |     |
|---------------------------------------------------------------------------------------------------------------------------------------|-----|
| General experimental note.....                                                                                                        | S2  |
| General procedure for the preparation of guanine nucleosides <b>6</b> & <b>7</b> , <b>8</b> & <b>9</b> and <b>10</b> & <b>11</b> .... | S2  |
| <sup>1</sup> H- and <sup>13</sup> C NMR Spectra of mixture of compounds <b>6</b> & <b>7</b> .....                                     | S3  |
| <sup>1</sup> H- and <sup>13</sup> C NMR Spectra of mixture of compounds <b>8</b> & <b>9</b> .....                                     | S4  |
| <sup>1</sup> H- and <sup>13</sup> C NMR Spectra of mixture of compounds <b>10</b> & <b>11</b> .....                                   | S5  |
| <sup>1</sup> H- and <sup>13</sup> C NMR Spectra of compound <b>6</b> .....                                                            | S6  |
| <sup>1</sup> H- and <sup>13</sup> C NMR Spectra of compound <b>8</b> .....                                                            | S7  |
| <sup>1</sup> H- and <sup>13</sup> C NMR Spectra of compound <b>9</b> .....                                                            | S8  |
| <sup>1</sup> H- and <sup>13</sup> C NMR Spectra of compound <b>10</b> .....                                                           | S9  |
| <sup>1</sup> H- and <sup>13</sup> C NMR Spectra of compound <b>11</b> .....                                                           | S10 |
| <sup>1</sup> H- and <sup>13</sup> C NMR Spectra of compound <b>12</b> .....                                                           | S11 |
| <sup>1</sup> H- and <sup>13</sup> C NMR Spectra of compound <b>13</b> .....                                                           | S12 |
| <sup>1</sup> H- and <sup>13</sup> C NMR Spectra of compound <b>14</b> .....                                                           | S13 |
| <sup>1</sup> H- and <sup>13</sup> C NMR Spectra of compound <b>15</b> .....                                                           | S14 |
| <sup>1</sup> H- and <sup>13</sup> C NMR Spectra of compound <b>16</b> .....                                                           | S15 |
| <sup>1</sup> H- and <sup>13</sup> C NMR Spectra of compound <b>17</b> .....                                                           | S16 |

### General experimental note

Melting points were determined on a Mettler FP 62 instrument or in a sulfuric acid bath and were uncorrected. The IR spectra were recorded on a FT-IR spectrometer by making KBr disc for solid samples and thin film for oils. The specific rotations were measured with Rudolph autopol II automatic polarimeter using light of 546 nm wavelength. The  $^1\text{H}$  NMR spectra were recorded on 400/300 MHz spectrometer and  $^{13}\text{C}$  NMR spectra were recorded on 100.6/75.5 MHz, respectively, using TMS as internal standard. The chemical shift values are on  $\delta$  scale and the coupling constants ( $J$ ) are in Hz. HRMS analysis was carried out on a microTOF-Q instrument from Bruker Daltonics, Bremen. They were run in ESI positive mode. The *Candida antarctica* lipase B immobilized on lewattite was used after storing *in vacuo* over  $\text{P}_2\text{O}_5$  for more than 24 hours. THF was dried over Na wire distilled and kept over Na wire prior to use. The spots on analytical TLCs were detected either under UV light or by charring with 4% alcoholic  $\text{H}_2\text{SO}_4$ . Silica gel (100-200 mesh) was used for column chromatography.

### General procedure for the preparation of guanine nucleosides **6** & **7**, **8** & **9** and **10** & **11**

2-*N*-isobutanoylguanine **2** (3.12 g, 14.15 mmol) was coupled with 1,2,3,5-tetra-*O*-acetyl- $\beta$ -D-ribofuranose (**3**), 1,2,3,5-tetra-*O*-acetyl- $\alpha,\beta$ -D-arabinofuranose (**4**) and 1,2,3,5-tetra-*O*-acetyl- $\alpha,\beta$ -L-arabinofuranose (**5**) (3.0 g, 9.4 mmol) in the presence of BSA (10.3 mL, 41.32 mmol) as silylating agent and TMSOTf (3.8 mL, 21.03 mmol) as Lewis acid catalyst following the method of Vorbrüggen, *et al.*<sup>11</sup> After completion of reaction on analytical TLC, reaction mixture was poured on ice-cold water and was extracted with chloroform (3 x 100 mL). The combined organic layer was washed with sodium hydrogen carbonate (2 x 50 mL) and brine (2 x 50 mL). Excess of solvent was evaporated under reduced pressure and the crude product thus obtained was purified by silica gel column chromatography to afford mixtures of 9-(2',3',5'-tri-*O*-acetyl- $\beta$ -D-ribofuranosyl)-*N*<sup>2</sup>-isobutanoylguanine (**6**) & 7-(2',3',5'-tri-*O*-acetyl- $\beta$ -D-ribofuranosyl)-*N*<sup>2</sup>-isobutanoylguanine (**7**) (87:13), 9-(2',3',5'-tri-*O*-acetyl- $\alpha$ -D-arabinofuranosyl)-*N*<sup>2</sup>-isobutanoylguanine (**8**) & 7-(2',3',5'-tri-*O*-acetyl- $\alpha$ -D-arabinofuranosyl)-*N*<sup>2</sup>-isobutanoylguanine (**9**) (63:37) and 9-(2',3',5'-tri-*O*-acetyl- $\alpha$ -L-arabinofuranosyl)-*N*<sup>2</sup>-isobutanoylguanine (**10**) & 7-(2',3',5'-tri-*O*-acetyl- $\alpha$ -L-arabinofuranosyl)-*N*<sup>2</sup>-isobutanoylguanine (**11**) (76:24) in 60, 62 and 65% yields, respectively.

# Mixture of Compounds 6 & 7

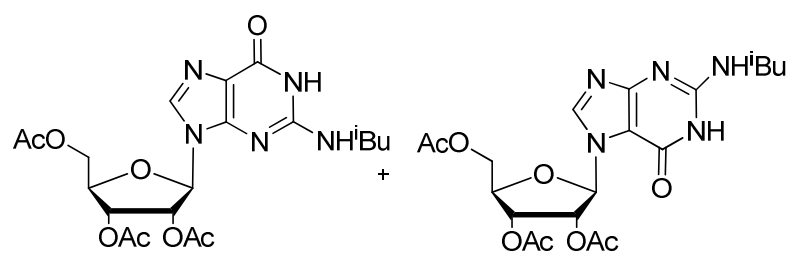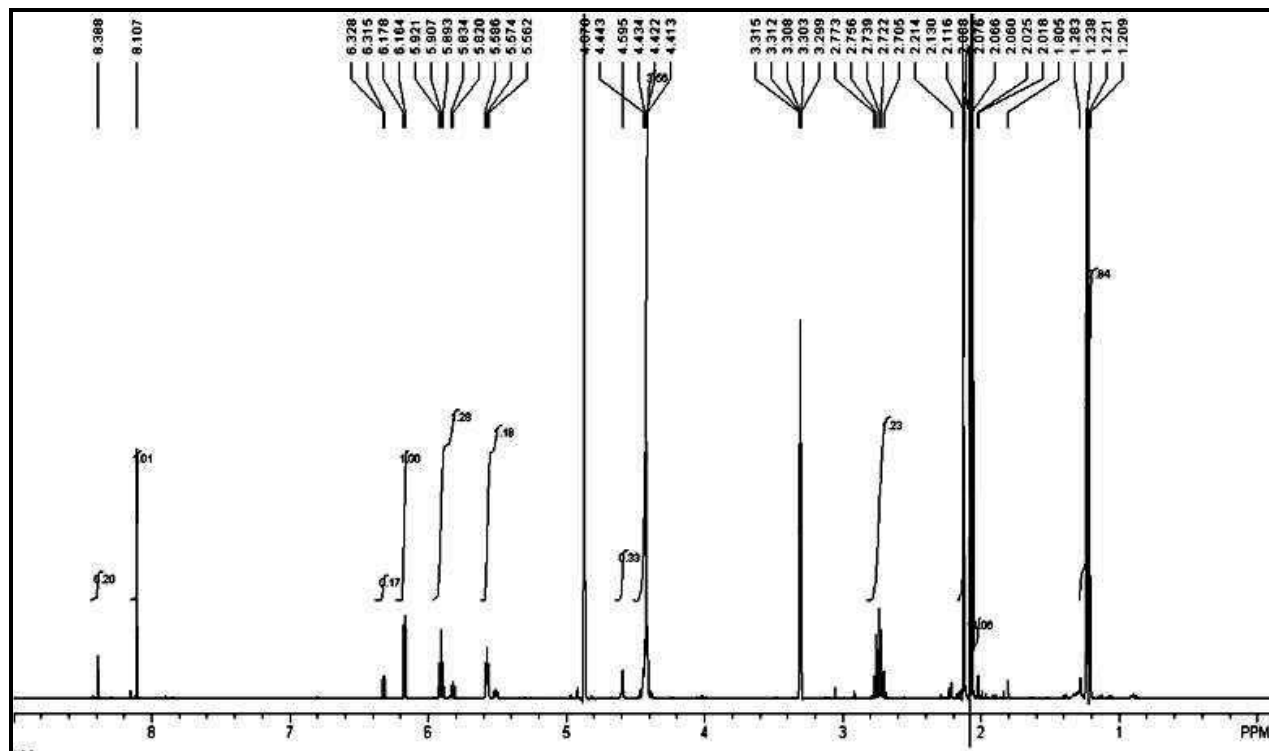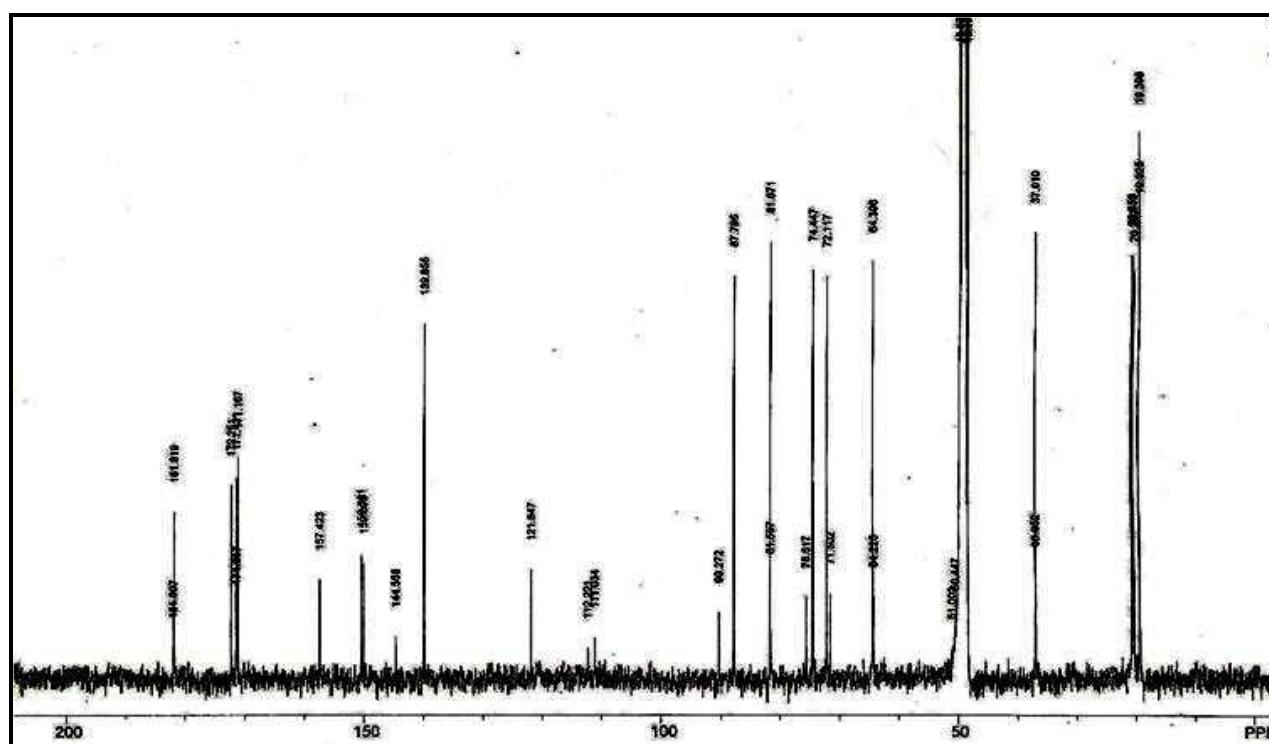

# Mixture of Compounds 8 & 9

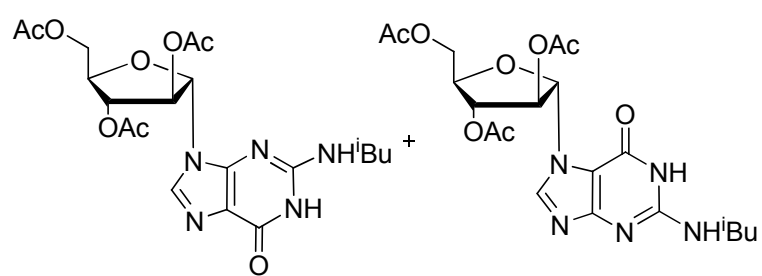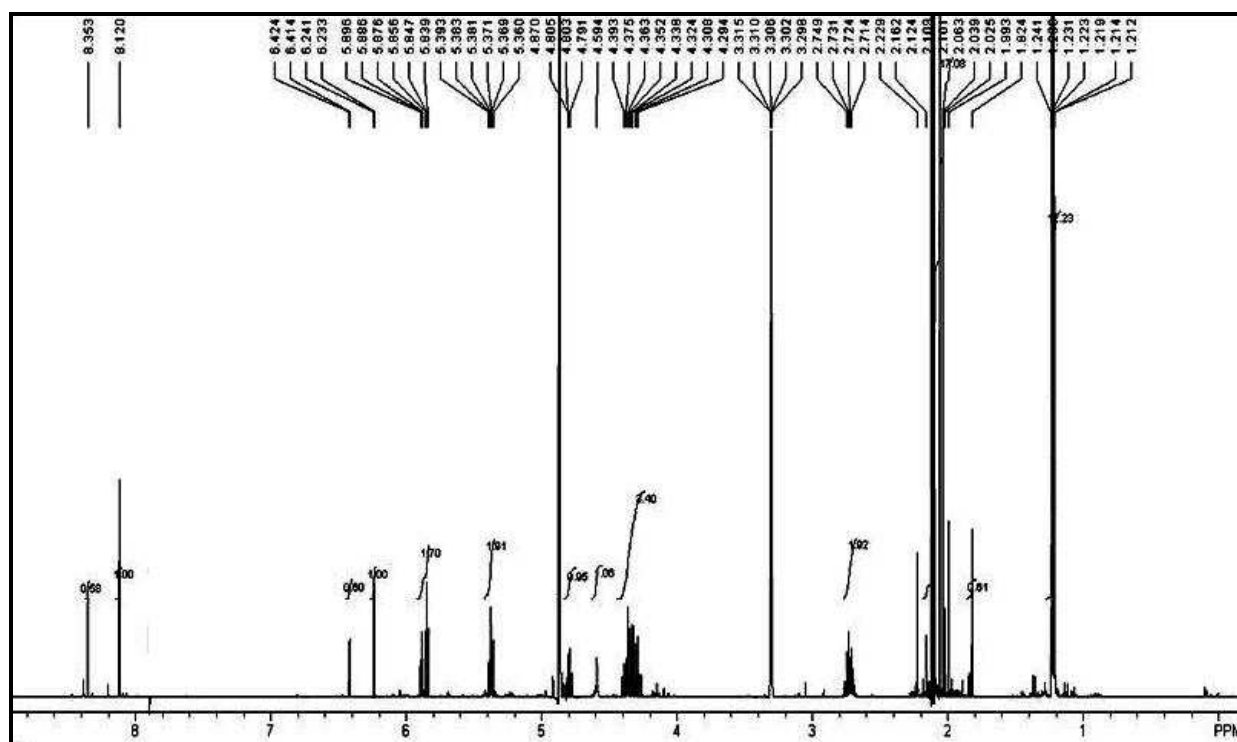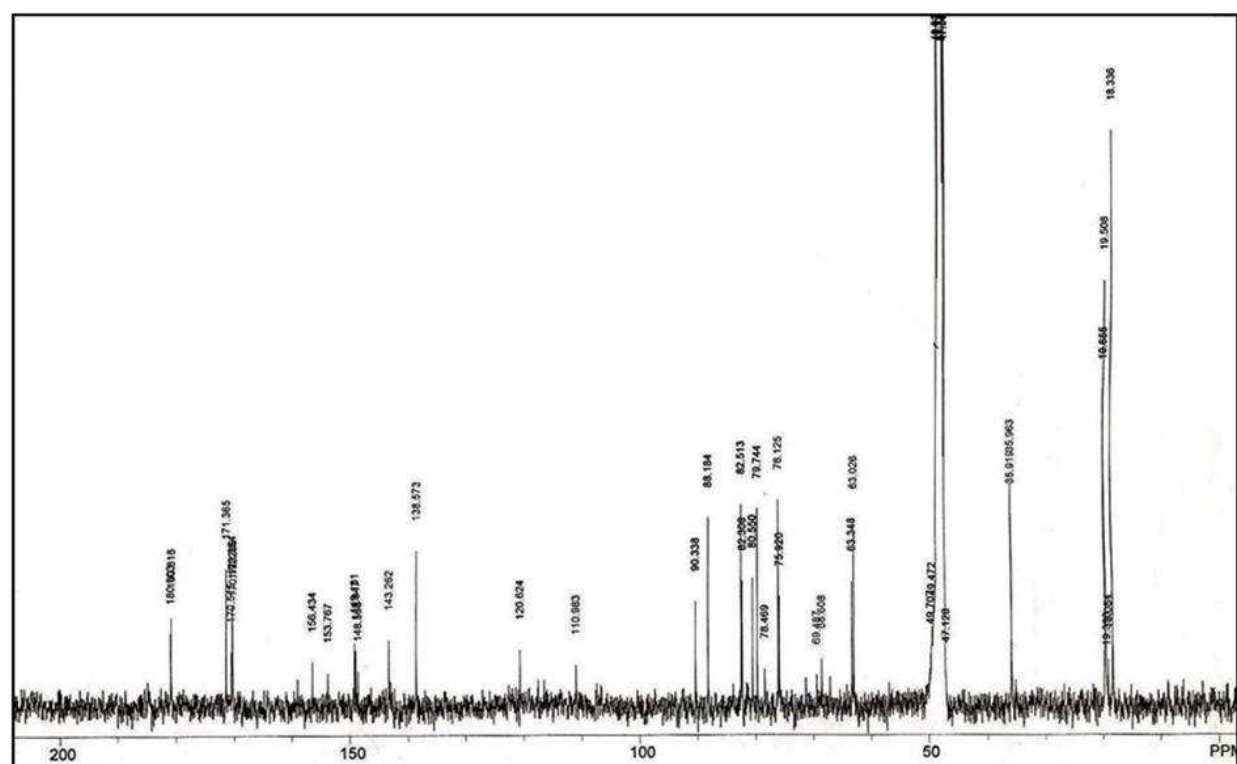

# Mixture of Compounds 10 & 11

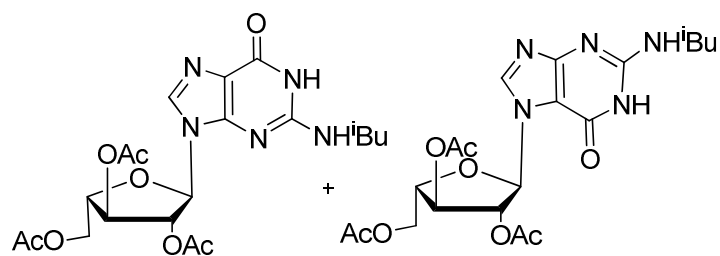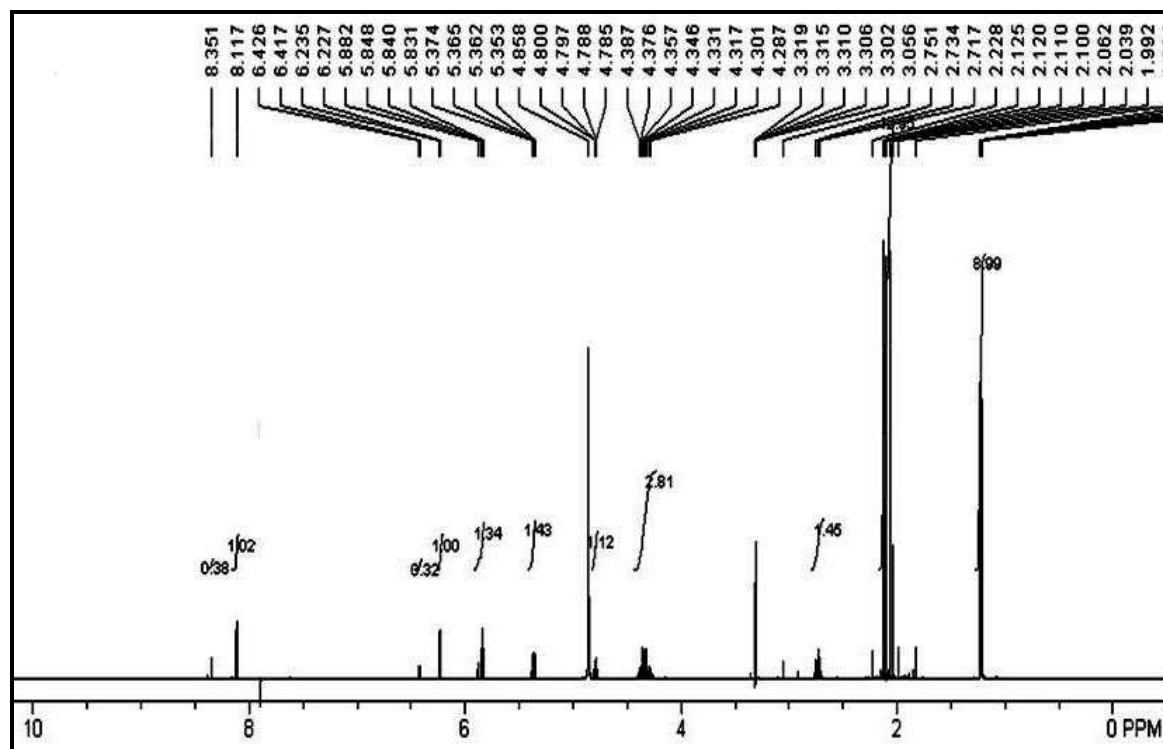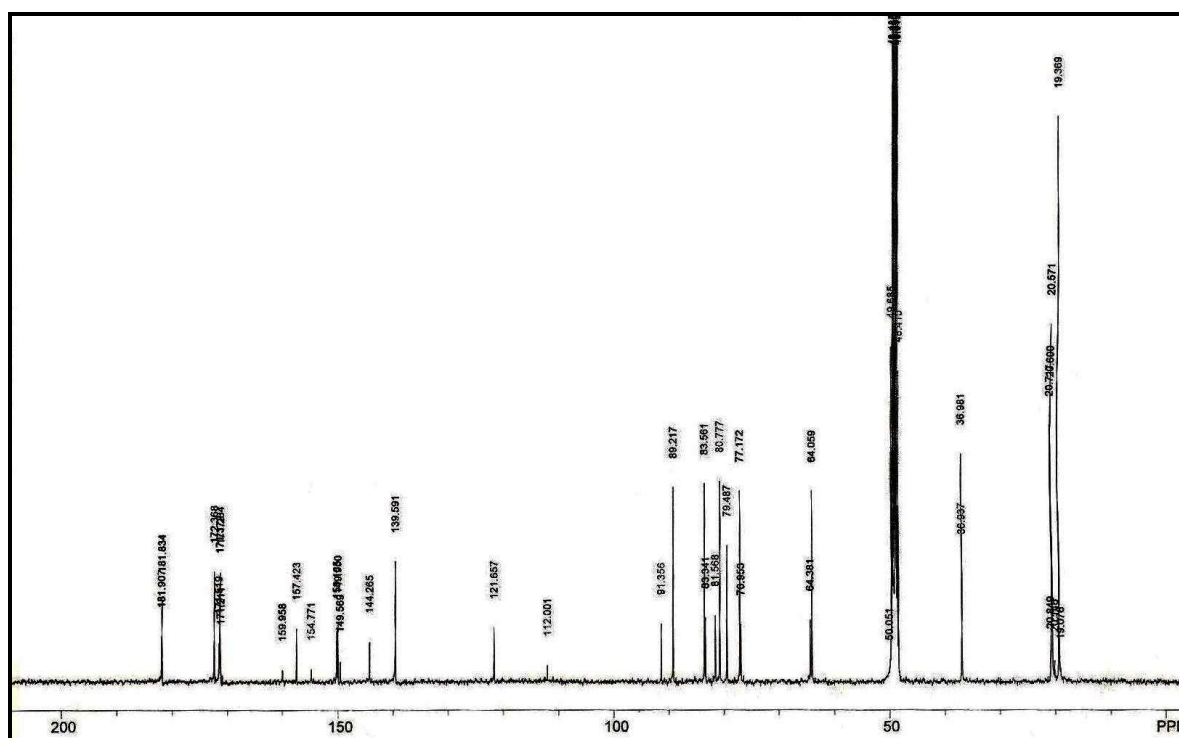

# Compound 6

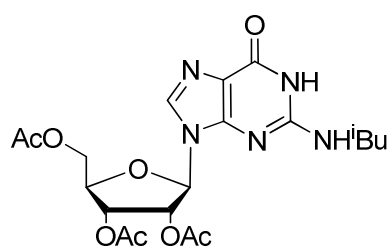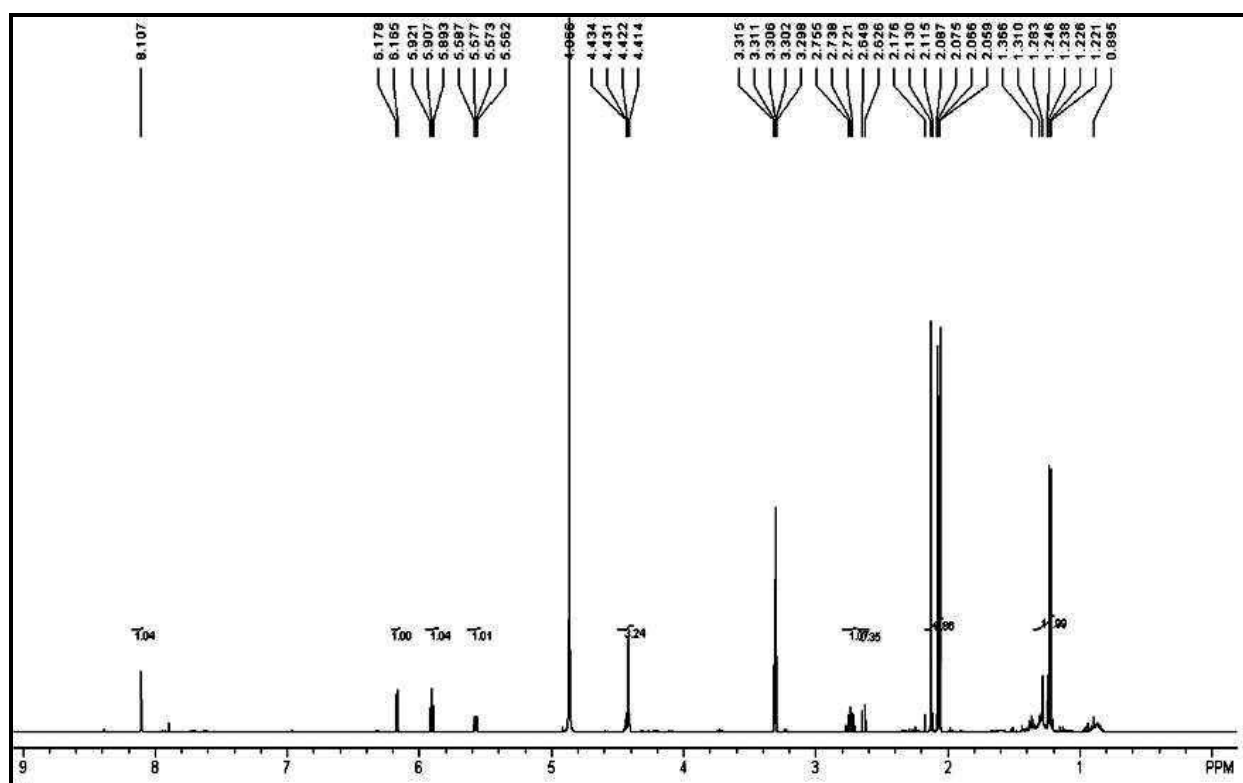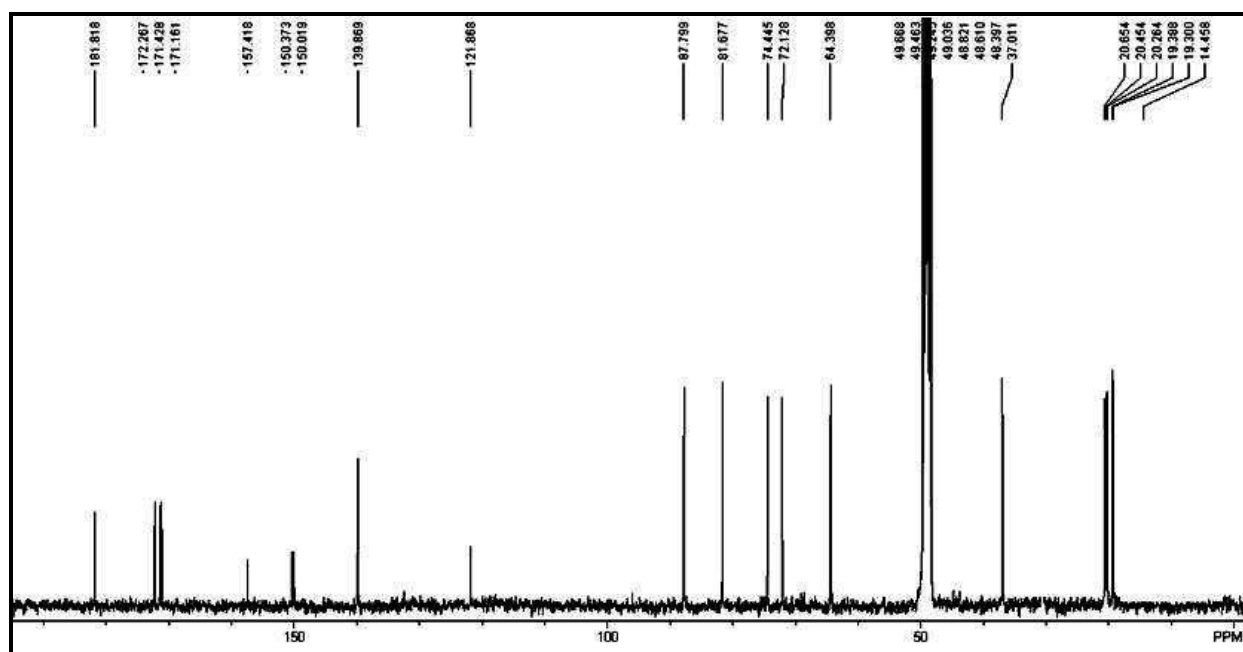

# Compound 8

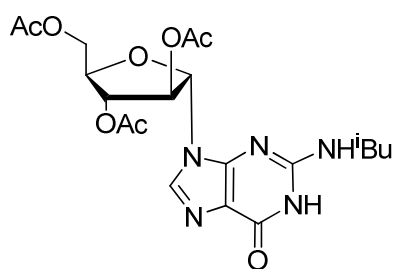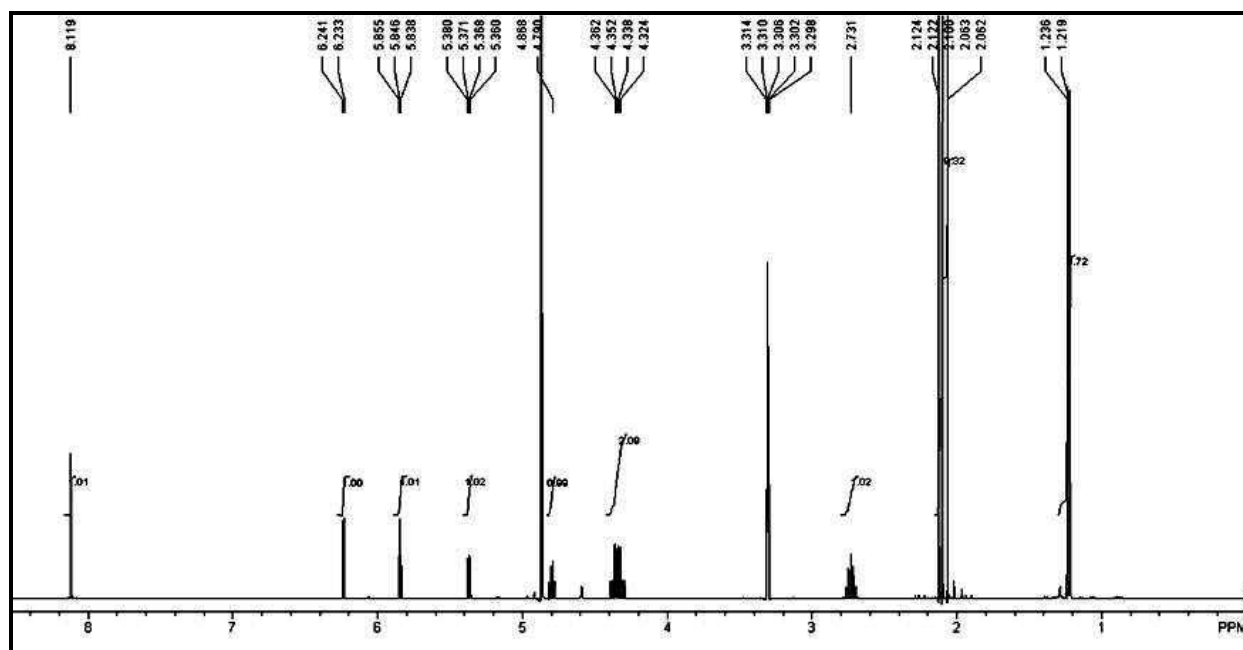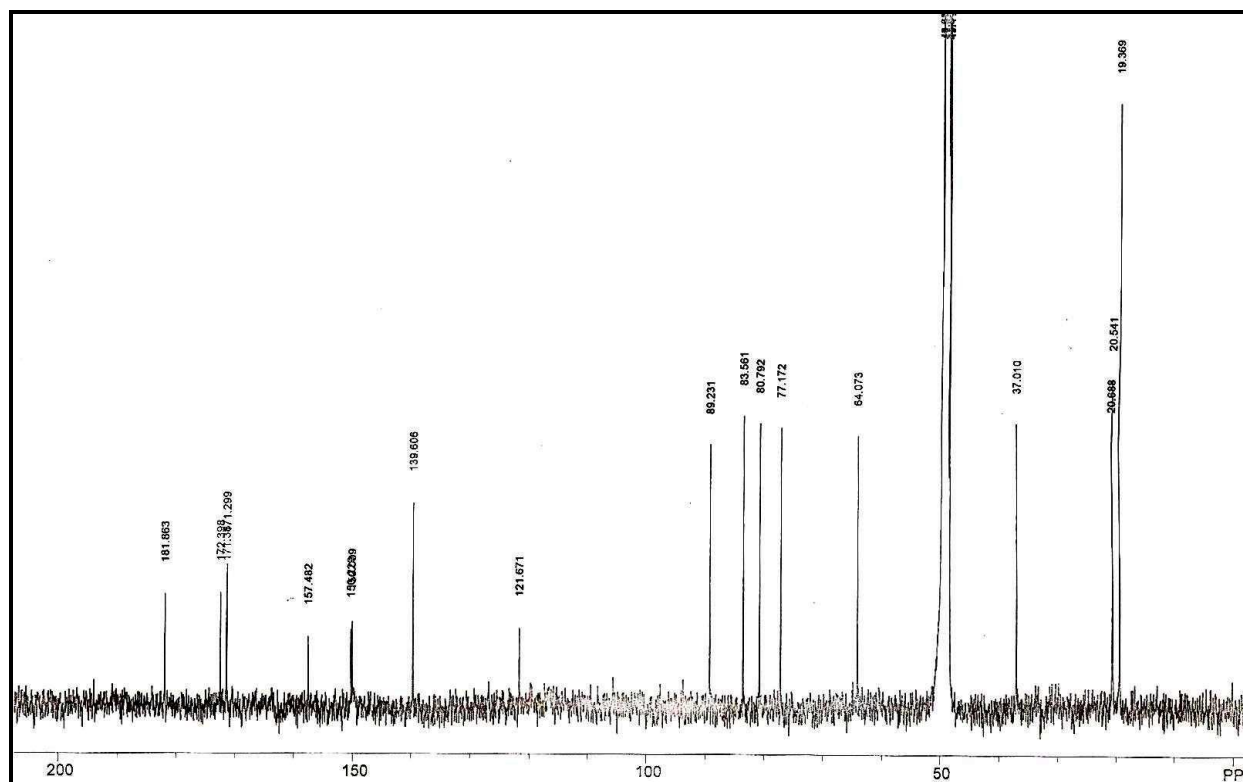

# Compound 9

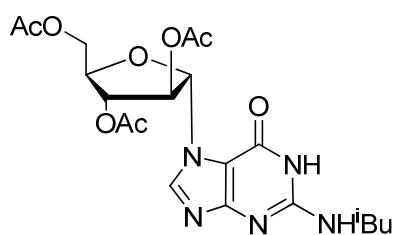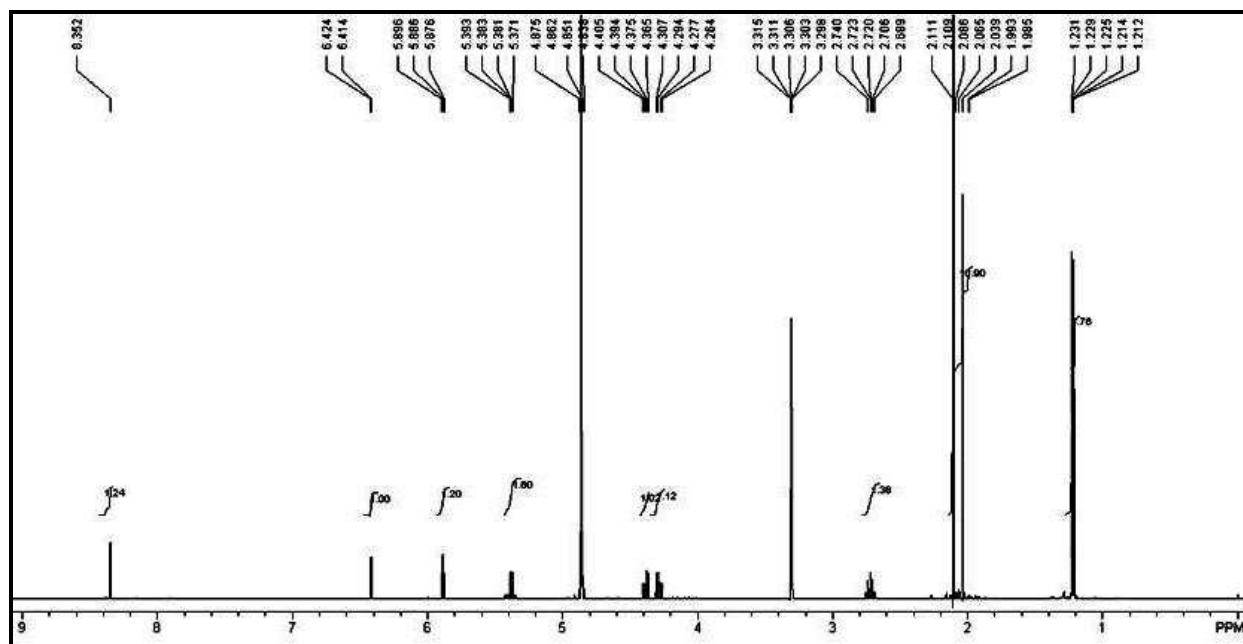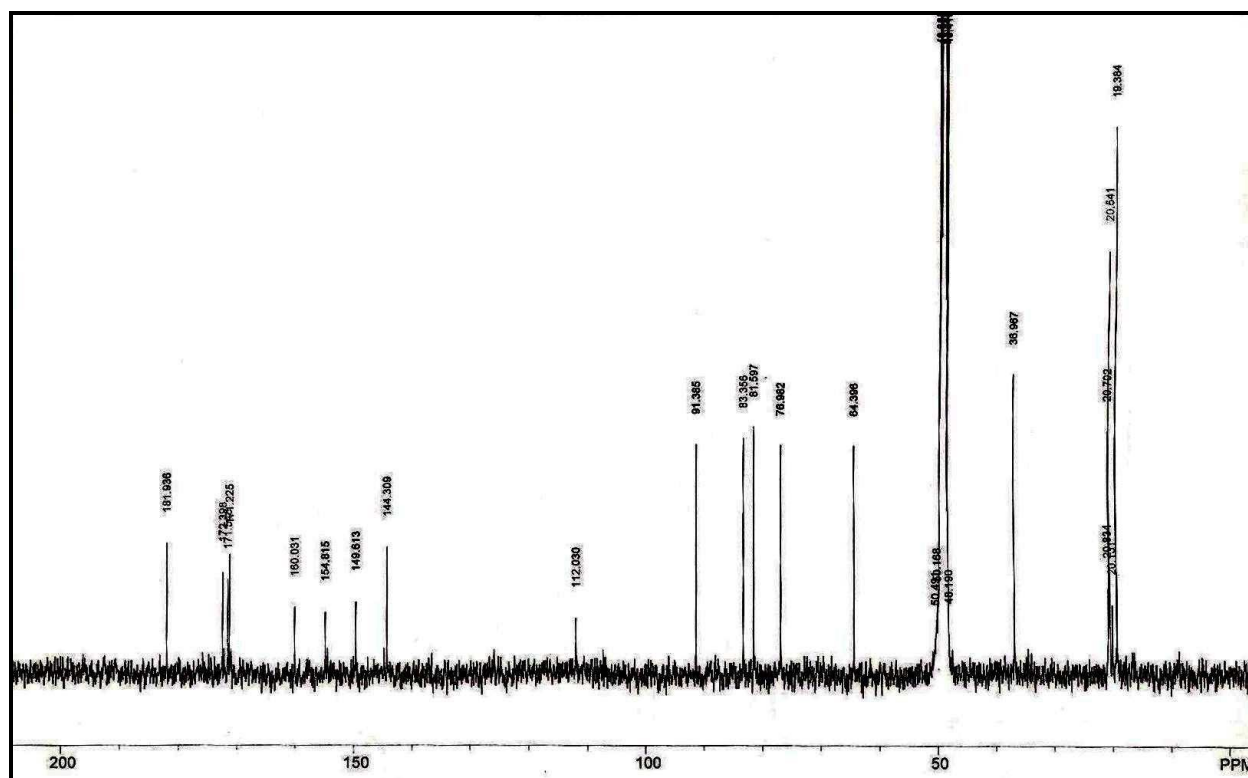



# Compound 10

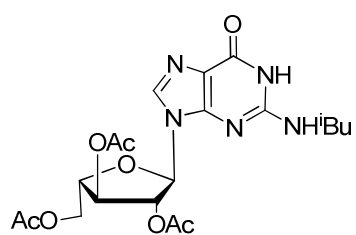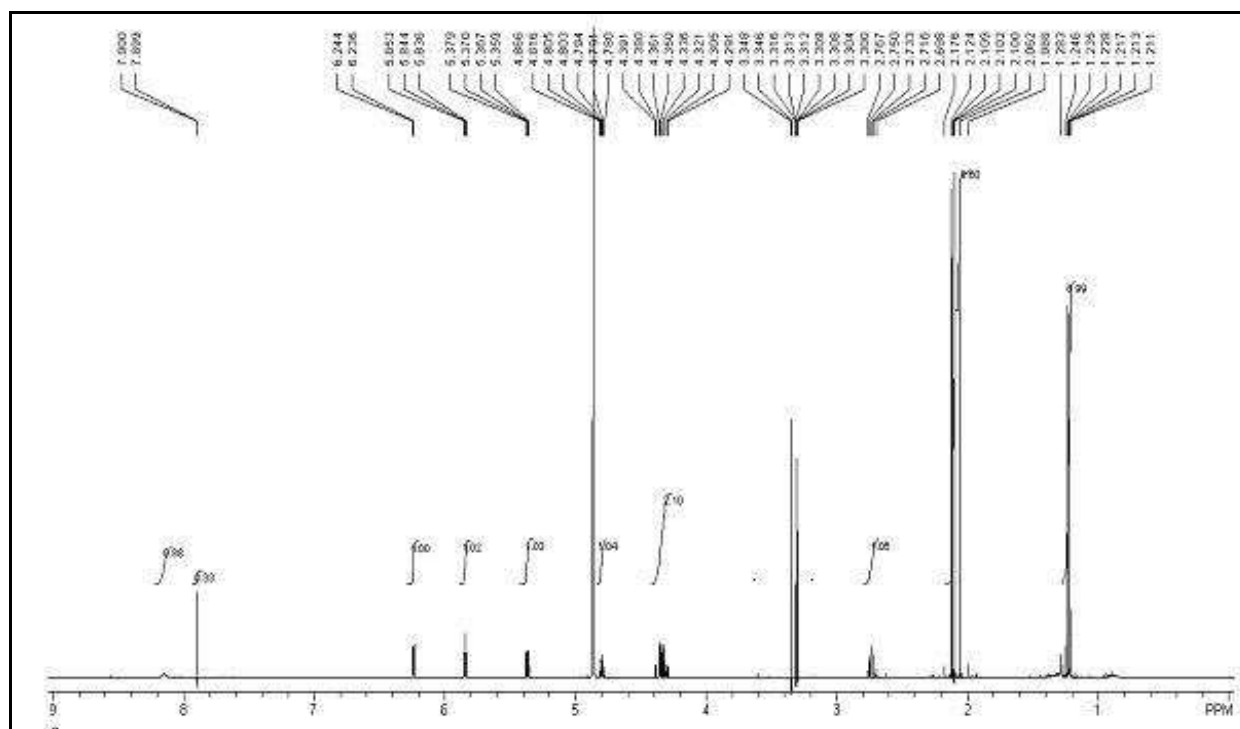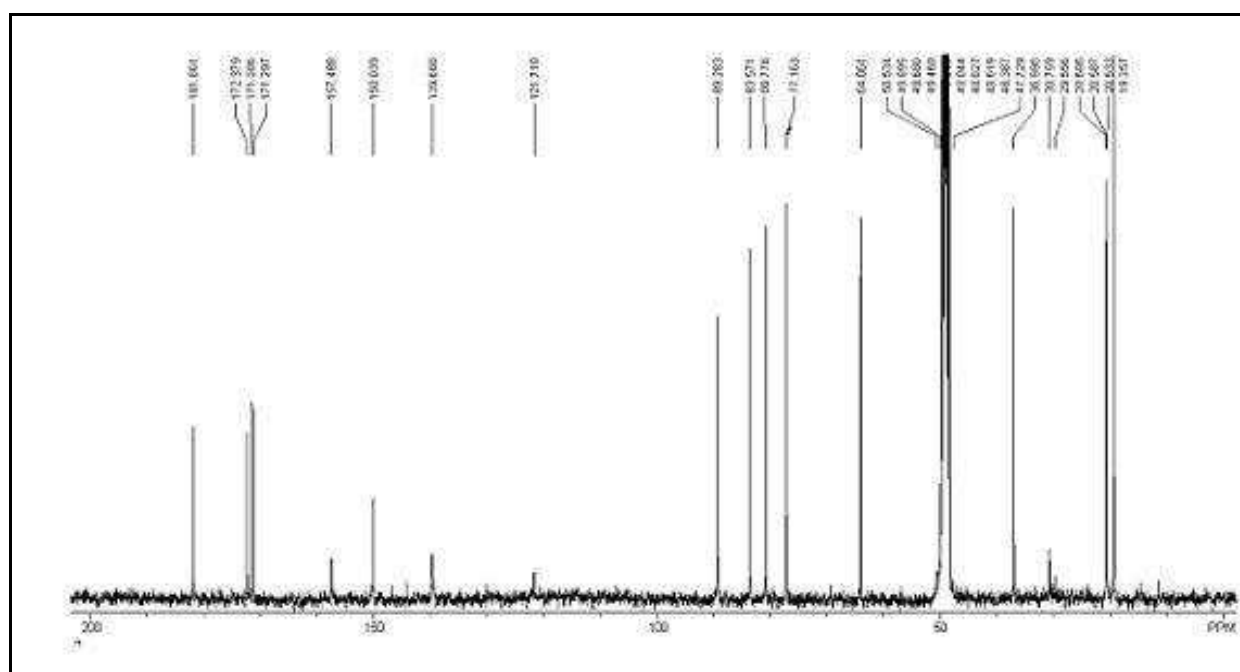

# Compound 11

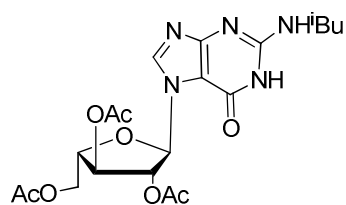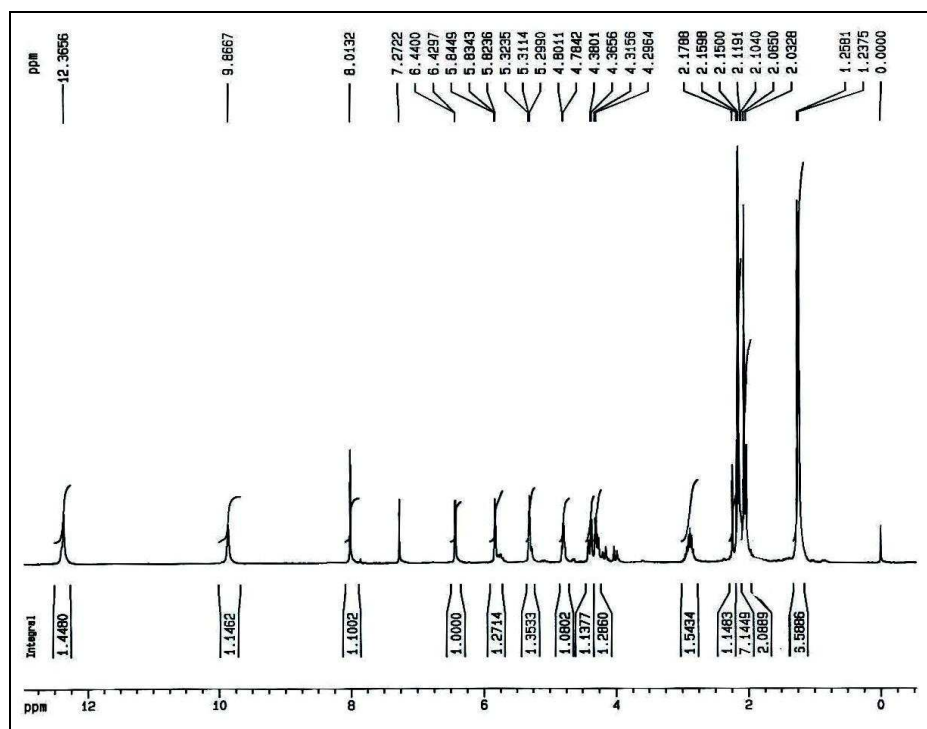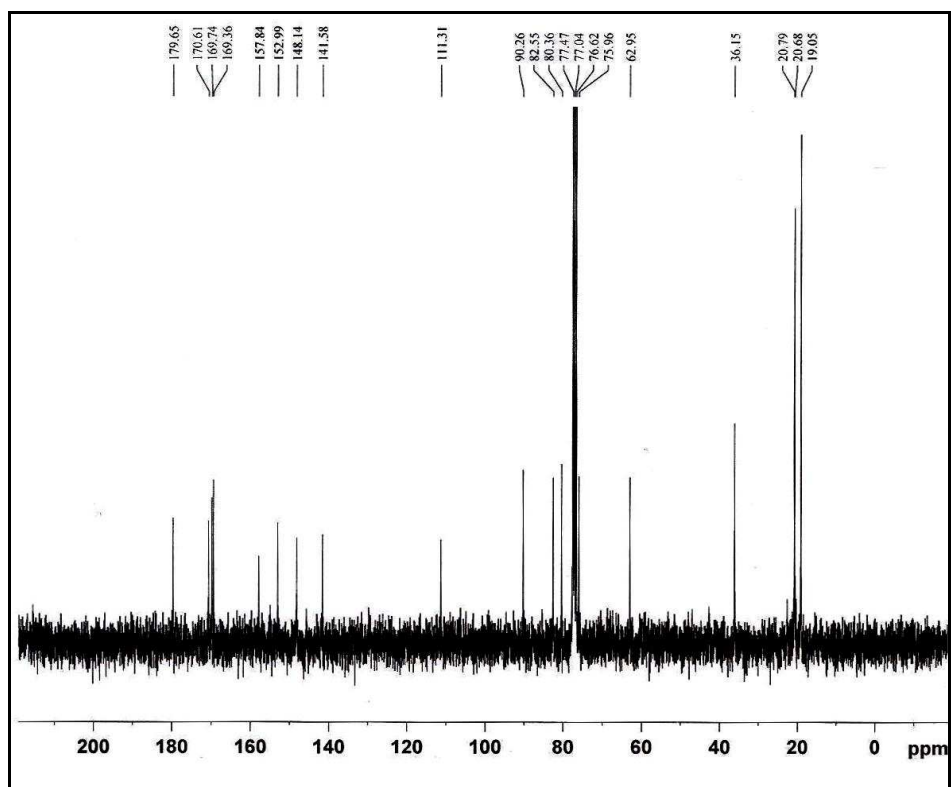

# Compound 12

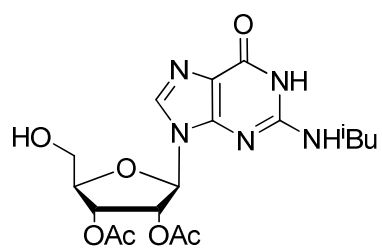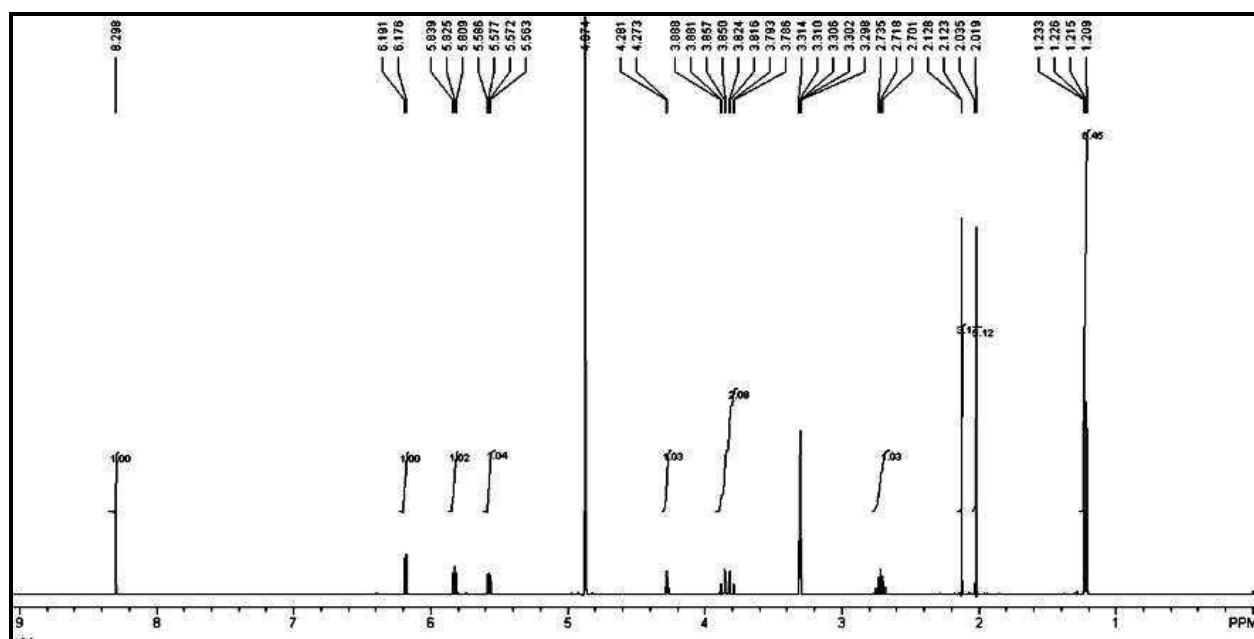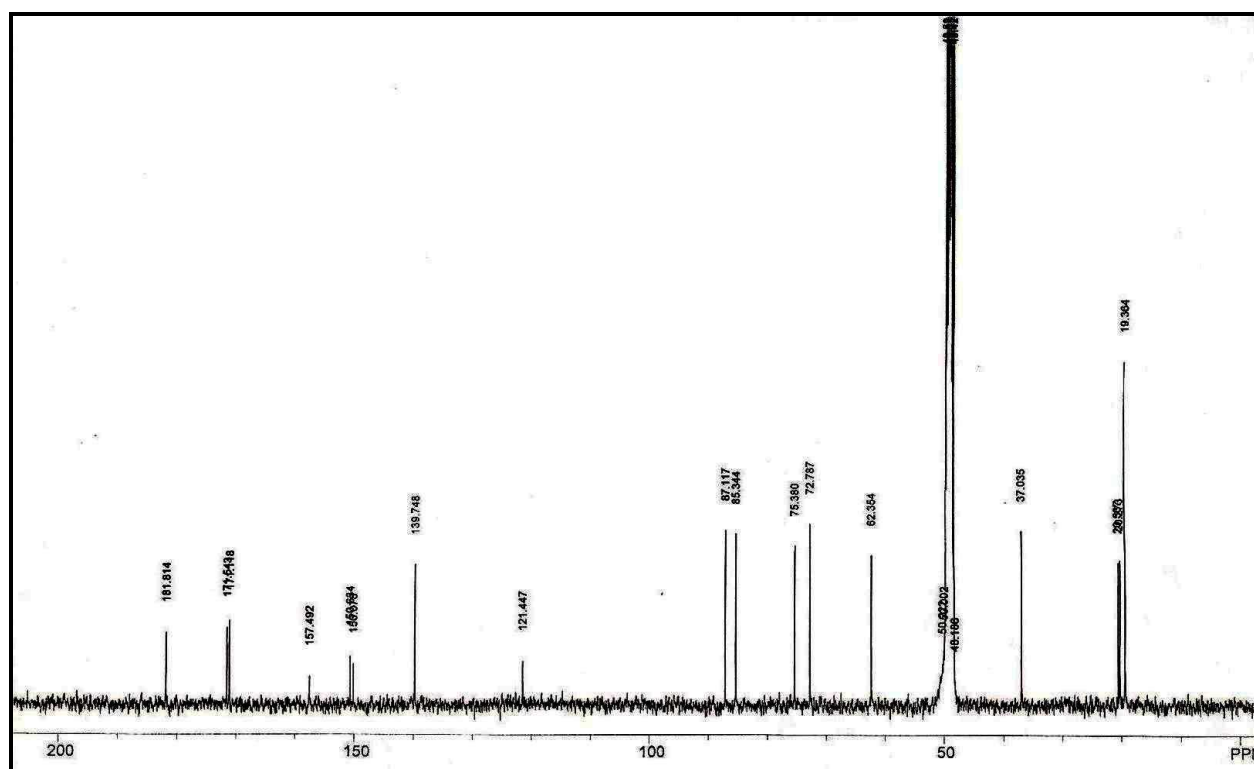

# Compound 13

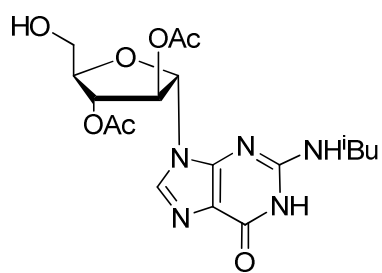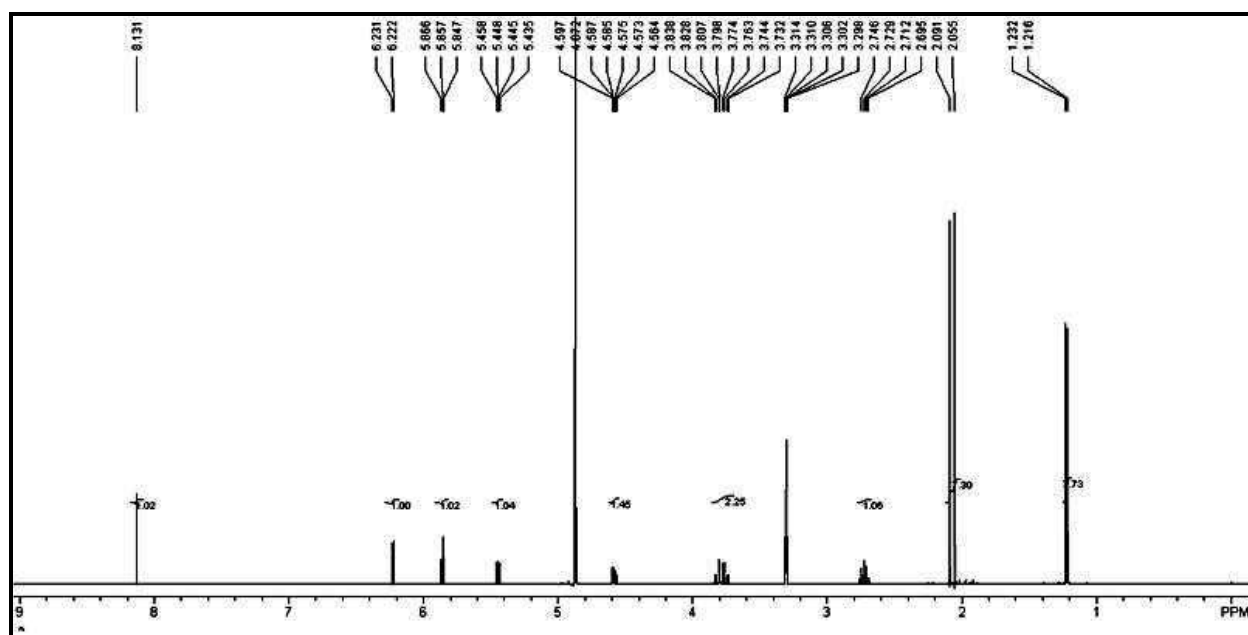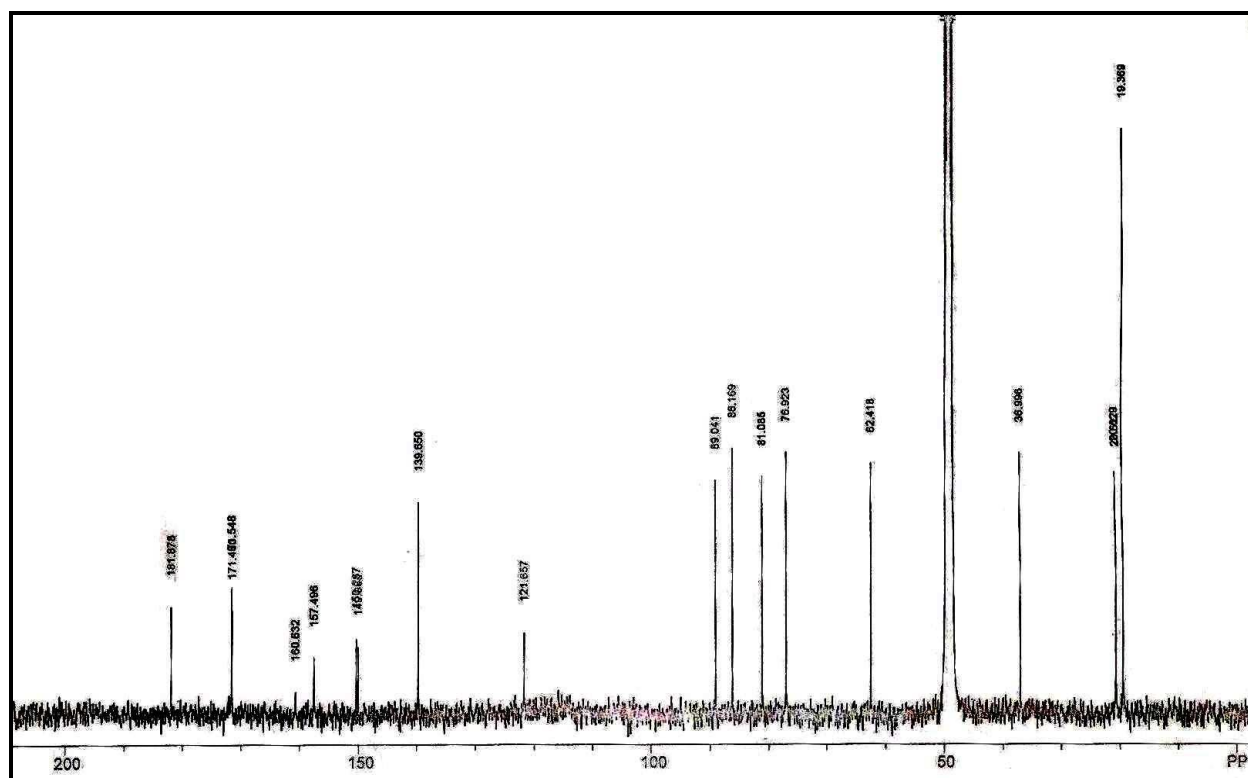

# Compound 14

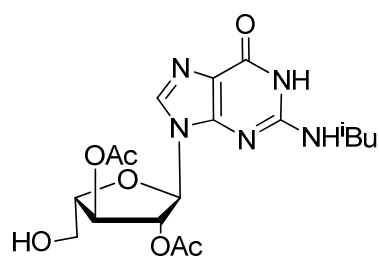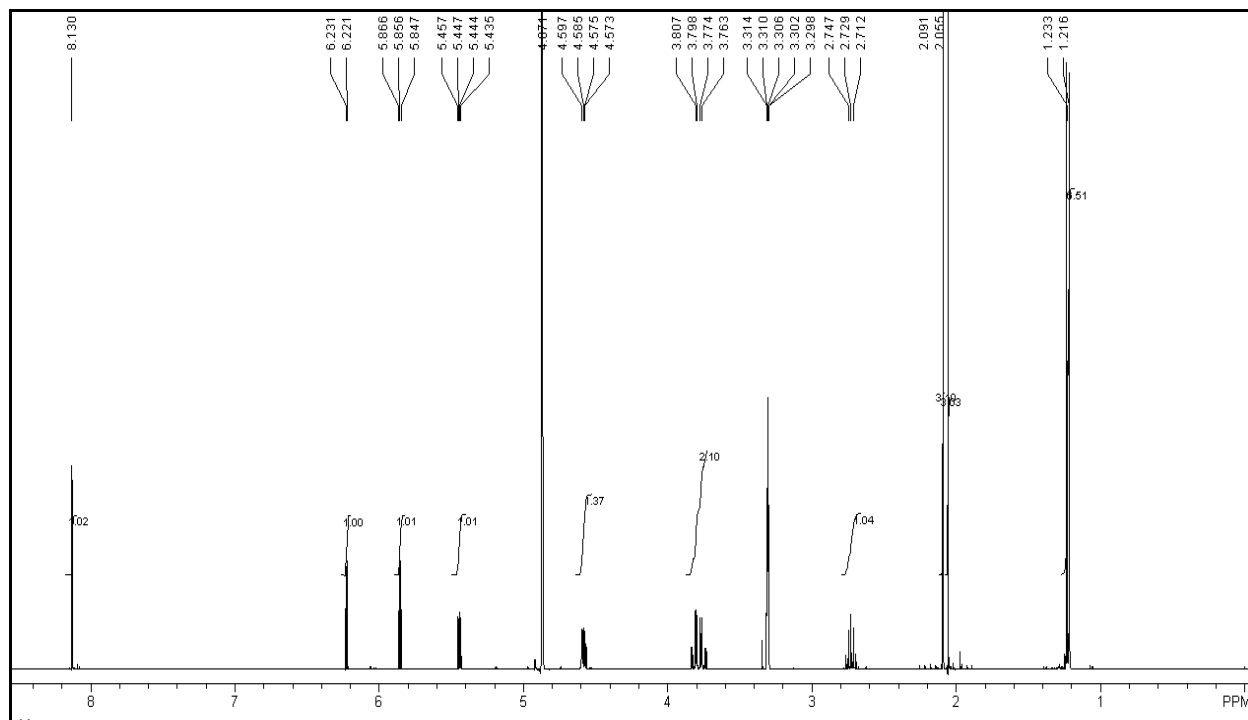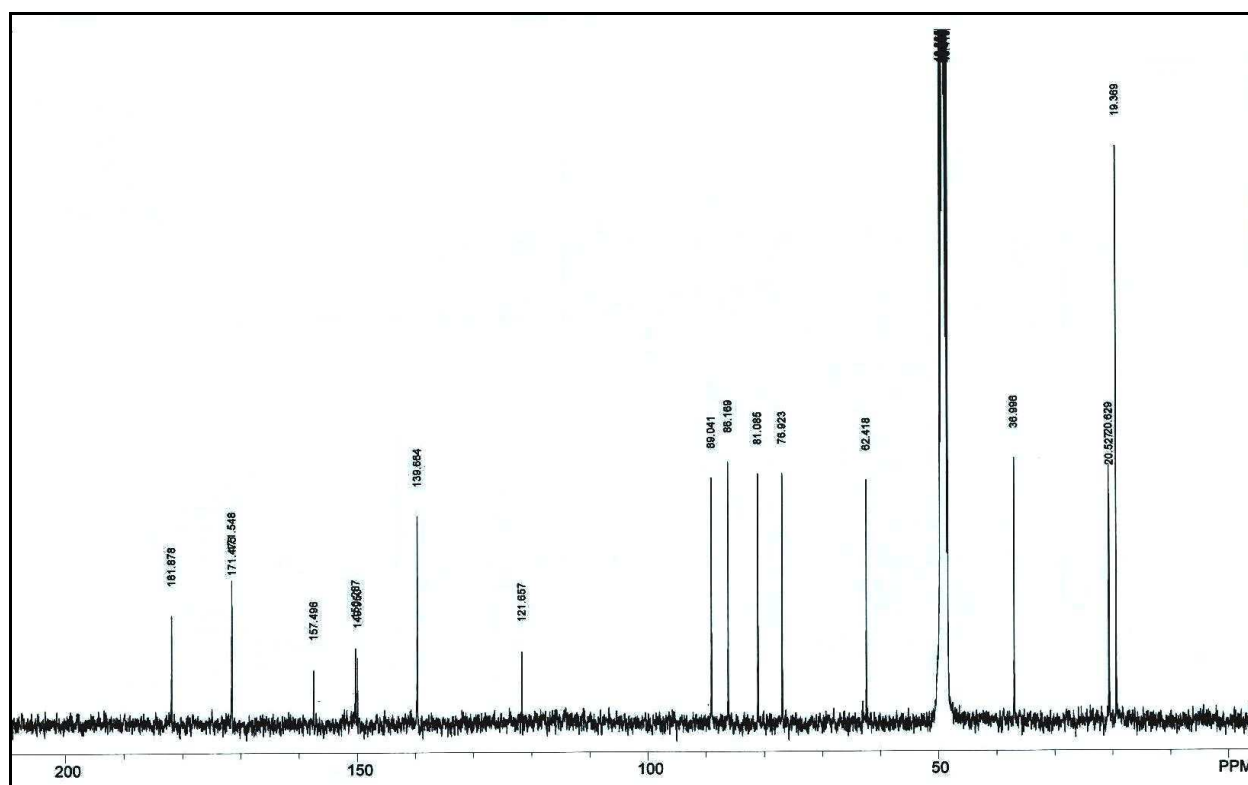

# Compound 15

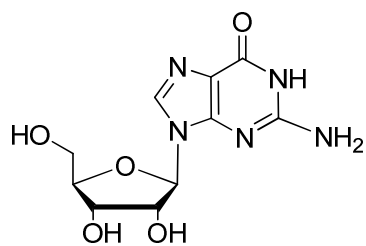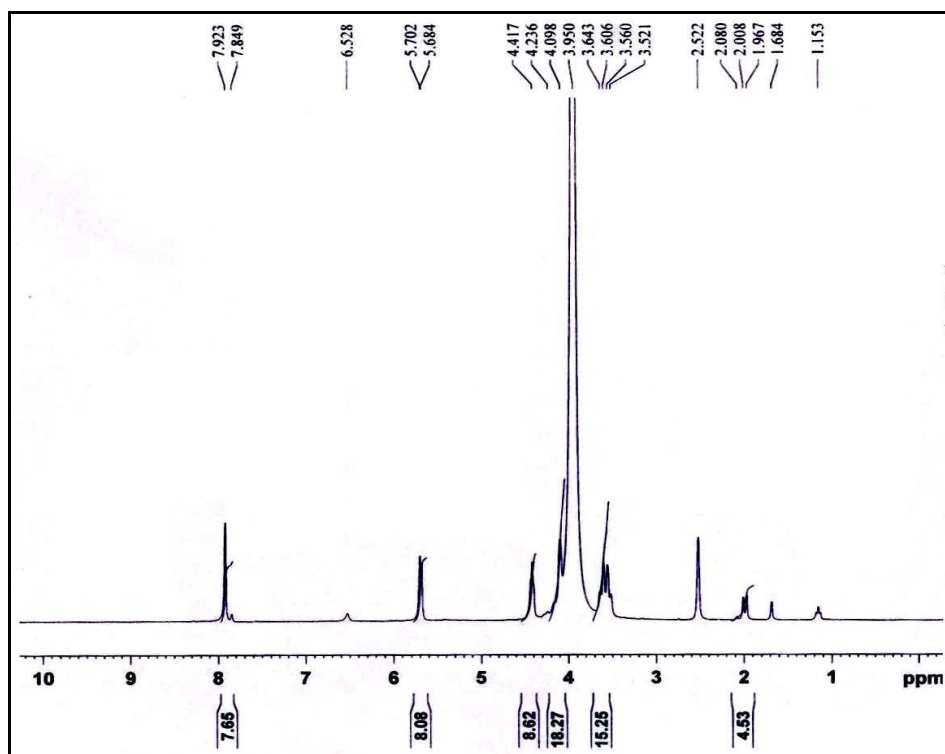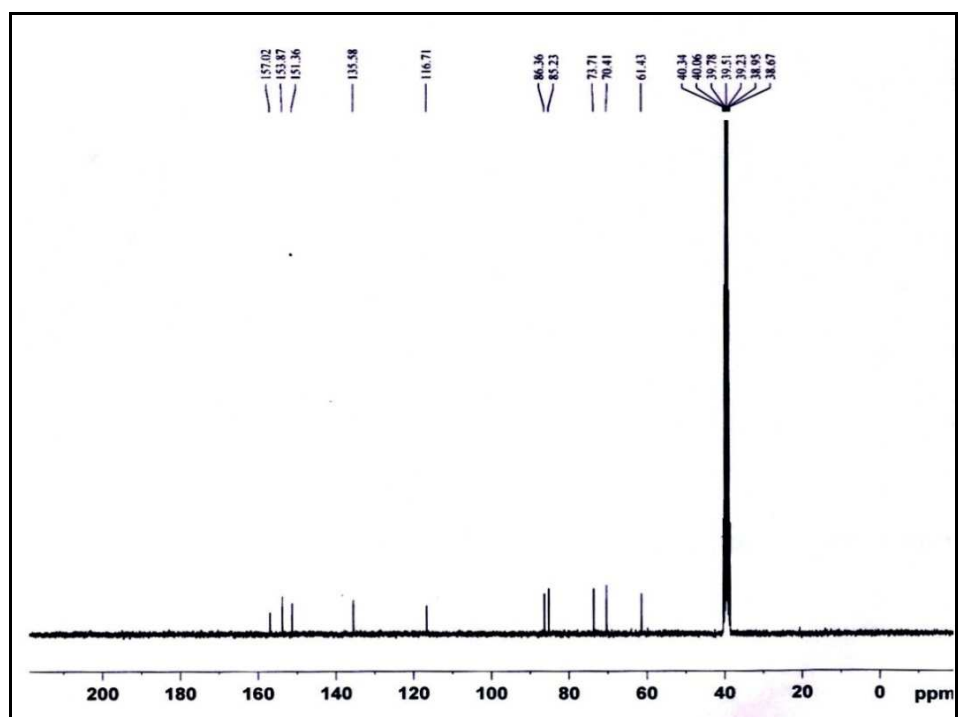

# Compound 16

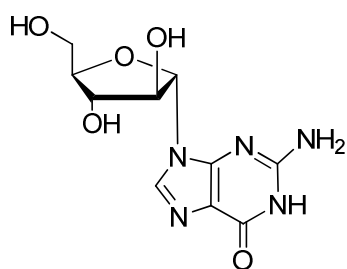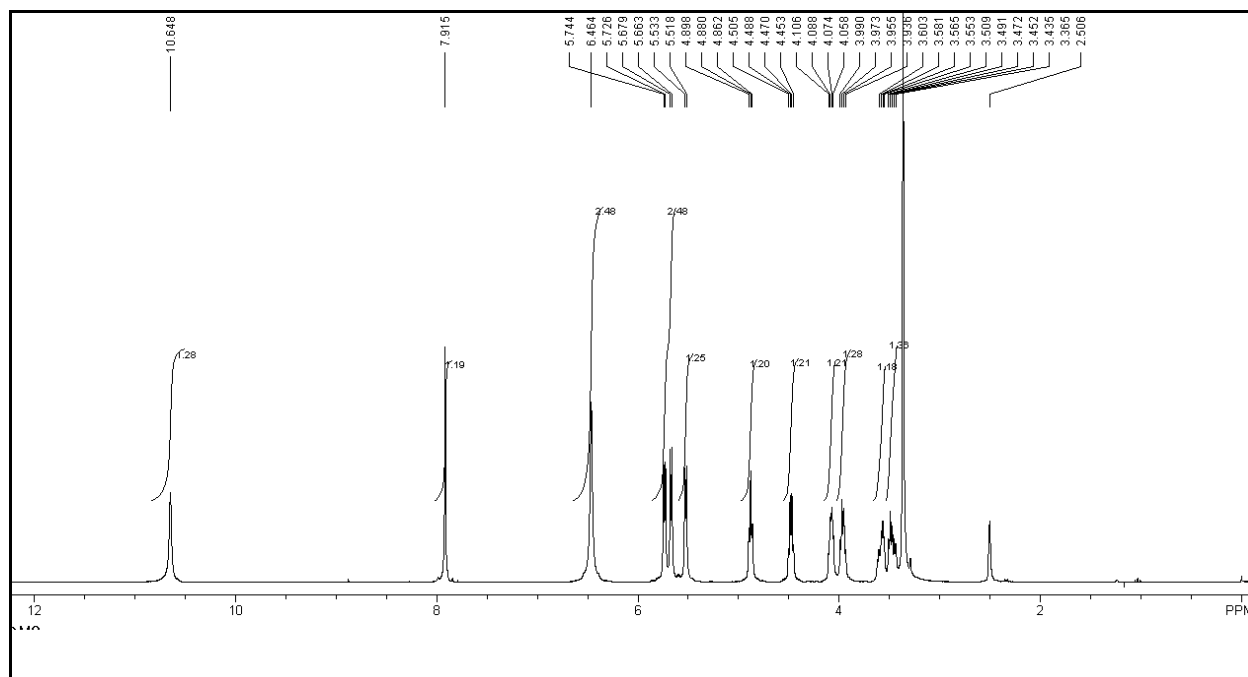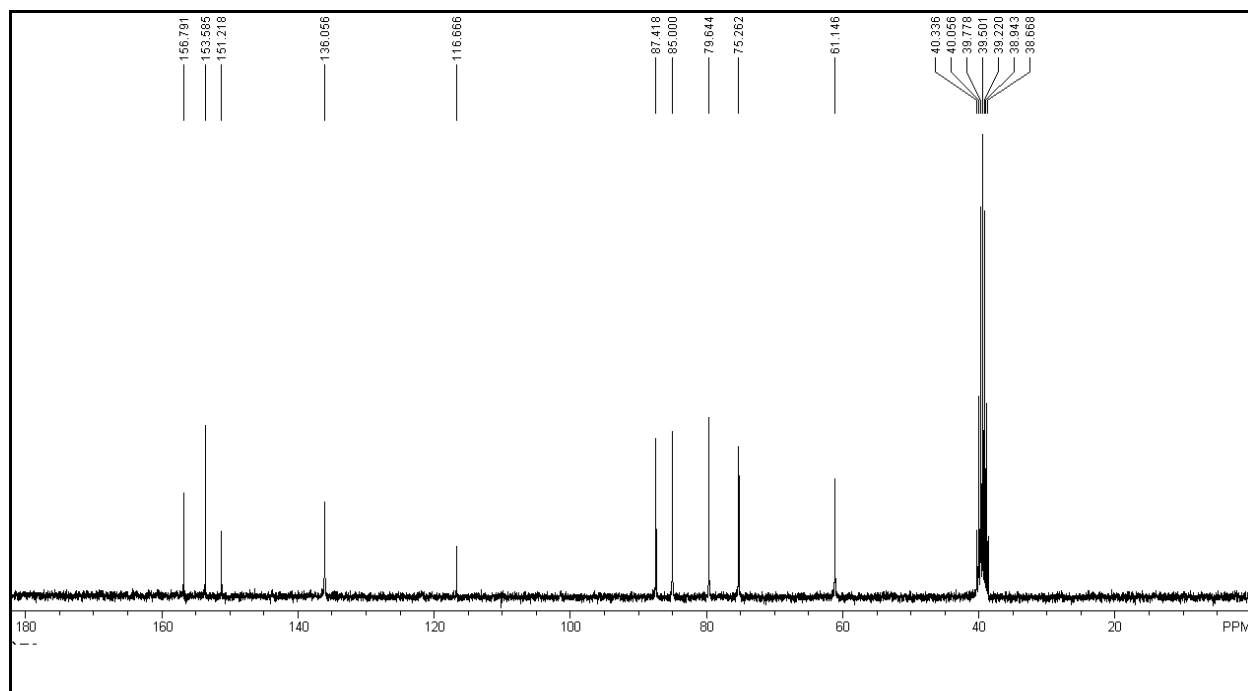

# Compound 17

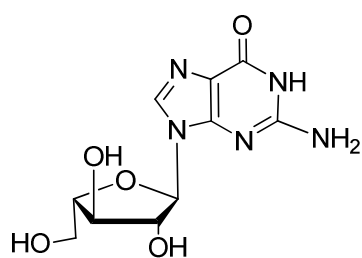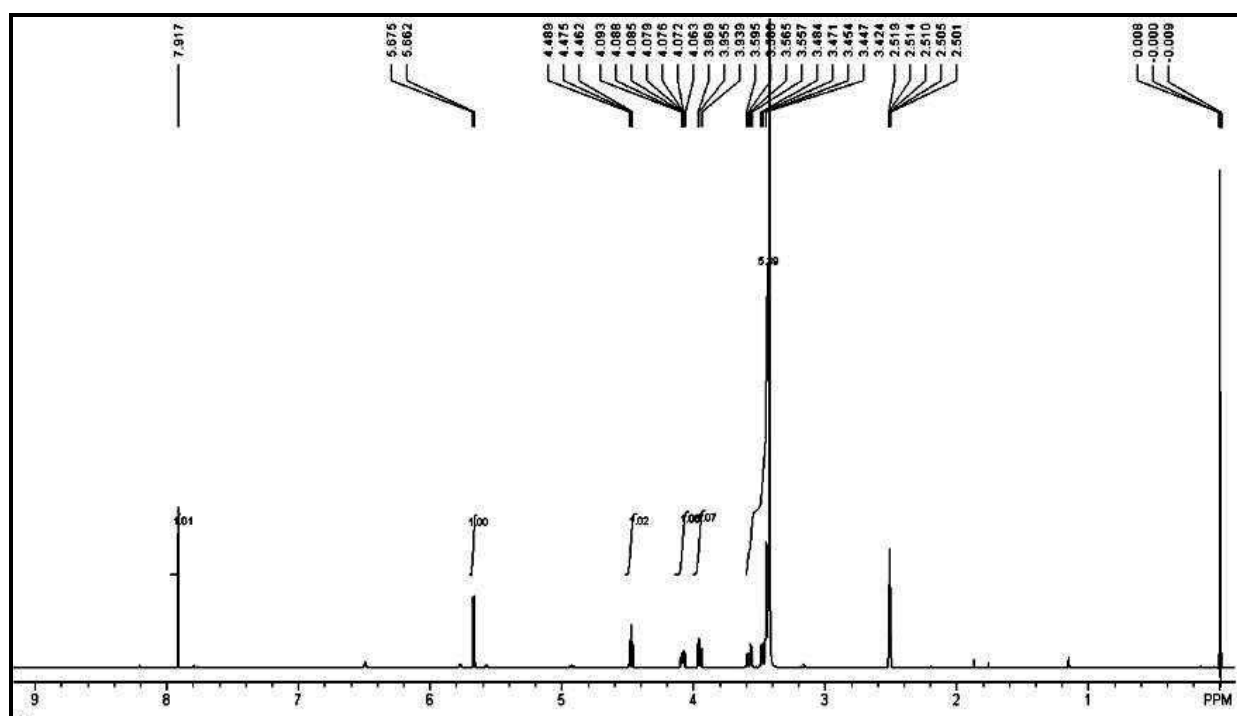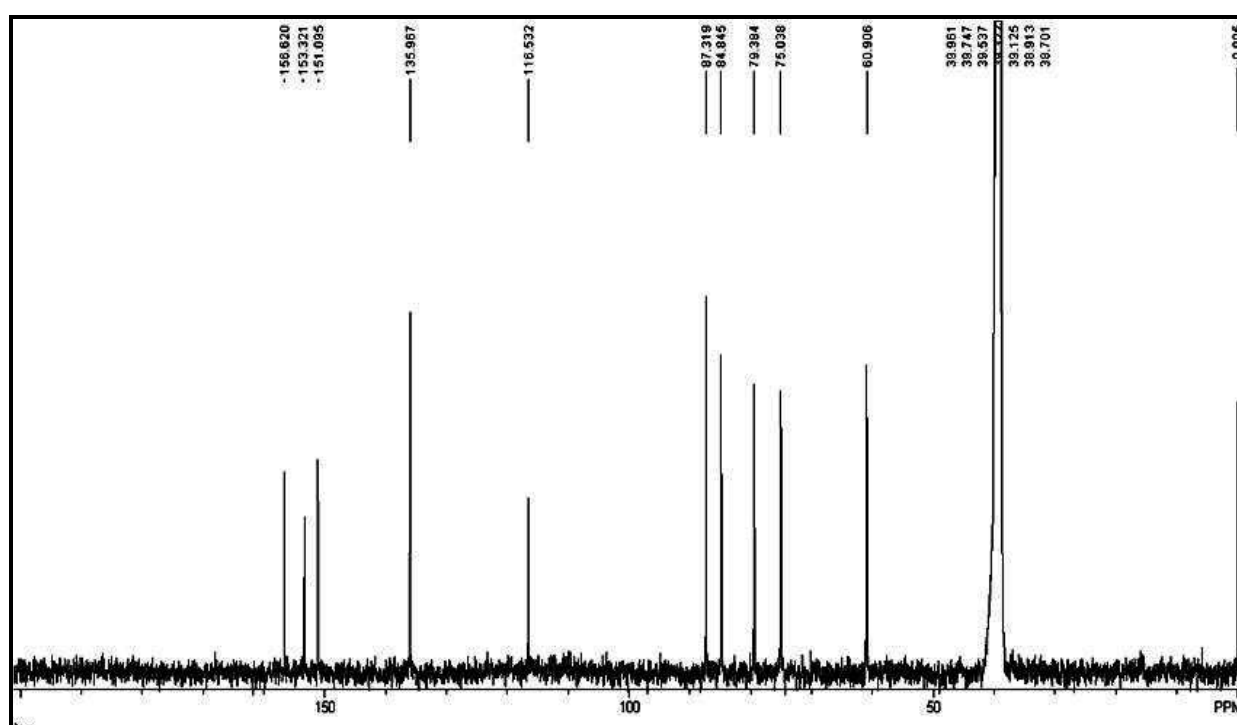

Supplement: Supplementary file 1 [file 4387306]
